# Supplementary material for: Seasonal and interannual dynamics of soil microbial biomass and available nitrogen in an alpine meadow in the eastern part of Qinghai–Tibet Plateau, China
Source: Copernicus journal article supplement (doi:10.5194/bg-15-567-2018), 2018-01-29
Supplement: Supplementary file 1 [file bg-15-567-2018-supplement.zip]

## Sheet: Sheet1
Date	Mean soil temperatures (℃)
2011-04-01	0.10792
2011-04-02	-0.23625
2011-04-03	-0.37375
2011-04-04	-0.17958
2011-04-05	0.0275
2011-04-06	0.06
2011-04-07	0.06583
2011-04-08	0.0775
2011-04-09	0.09208
2011-04-10	0.1125
2011-04-11	0.74833
2011-04-12	-2.48083
2011-04-13	-2.55417
2011-04-14	1.68042
2011-04-15	-1.2025
2011-04-16	-3.99292
2011-04-17	-3.12583
2011-04-18	-0.60375
2011-04-19	-0.04708
2011-04-20	-0.04708
2011-04-21	-0.04708
2011-04-22	-0.75083
2011-04-23	-0.82542
2011-04-24	-0.49083
2011-04-25	0.23792
2011-04-26	1.49583
2011-04-27	0.92833
2011-04-28	0.12042
2011-04-29	0.4875
2011-04-30	0.13542
2011-05-01	-0.47917
2011-05-02	-0.39583
2011-05-03	-0.3125
2011-05-04	-0.25
2011-05-05	0.08333
2011-05-06	1.02083
2011-05-07	1.39583
2011-05-08	1.39583
2011-05-09	1.04167
2011-05-10	1.5625
2011-05-11	1.8125
2011-05-12	1.0625
2011-05-13	0.8125
2011-05-14	0.6
2011-05-15	0.375
2011-05-16	0.77083
2011-05-17	0.64583
2011-05-18	1.6875
2011-05-19	2.0625
2011-05-20	2.89583
2011-05-21	2.77083
2011-05-22	1.35417
2011-05-23	2.02083
2011-05-24	1.14583
2011-05-25	1.48529
2011-05-26	2.60417
2011-05-27	3.33333
2011-05-28	3.5
2011-05-29	3.29167
2011-05-30	1.35417
2011-05-31	0.1875
2011-06-01	0.3
2011-06-02	0.375
2011-06-03	3.08333
2011-06-04	4.75
2011-06-05	4.29167
2011-06-06	4.625
2011-06-07	5.375
2011-06-08	5.64583
2011-06-09	5.6875
2011-06-10	5.08333
2011-06-11	4.59375
2011-06-12	5.125
2011-06-13	5.47917
2011-06-14	5.60417
2011-06-15	5.64583
2011-06-16	5.03125
2011-06-17	6.30208
2011-06-18	6.92708
2011-06-19	7.11458
2011-06-20	6.78125
2011-06-21	6.96875
2011-06-22	7.19792
2011-06-23	7.57292
2011-06-24	6.64625
2011-06-25	7.71708
2011-06-26	6.91292
2011-06-27	8.00125
2011-06-28	9.7075
2011-06-29	8.76167
2011-06-30	7.675
2011-07-01	9.70708
2011-07-02	9.22833
2011-07-03	9.00792
2011-07-04	6.44833
2011-07-05	10.1662
2011-07-06	9.36042
2011-07-07	9.5875
2011-07-08	9.87875
2011-07-09	10.265
2011-07-10	11.0292
2011-07-11	6.80792
2011-07-12	5.87792
2011-07-13	10.4692
2011-07-14	7.83958
2011-07-15	8.87
2011-07-16	9.85333
2011-07-17	7.845
2011-07-18	8.6575
2011-07-19	8.92542
2011-07-20	9.9125
2011-07-21	9.10542
2011-07-22	8.24875
2011-07-23	6.77417
2011-07-24	7.97
2011-07-25	10.6579
2011-07-26	11.1387
2011-07-27	9.61042
2011-07-28	11.6596
2011-07-29	12.105
2011-07-30	10.7358
2011-07-31	6.57167
2011-08-01	6.075
2011-08-02	10.0558
2011-08-03	10.4133
2011-08-04	9.7925
2011-08-05	9.49792
2011-08-06	10.3275
2011-08-07	11.4367
2011-08-08	10.9279
2011-08-09	11.3658
2011-08-10	12.4
2011-08-11	13.4854
2011-08-12	12.2733
2011-08-13	12.805
2011-08-14	10.1729
2011-08-15	11.1608
2011-08-16	12.0471
2011-08-17	9.67292
2011-08-18	8.045
2011-08-19	6.24958
2011-08-20	7.99833
2011-08-21	5.04083
2011-08-22	5.58917
2011-08-23	6.91958
2011-08-24	7.69917
2011-08-25	5.92667
2011-08-26	8.17
2011-08-27	6.54583
2011-08-28	7.30875
2011-08-29	8.74292
2011-08-30	8.77792
2011-08-31	8.06208
2011-09-01	5.85125
2011-09-02	7.505
2011-09-03	7.29583
2011-09-04	7.79583
2011-09-05	8.18
2011-09-06	8.00917
2011-09-07	8.71167
2011-09-08	8.67625
2011-09-09	8.08542
2011-09-10	8.33208
2011-09-11	7.97292
2011-09-12	3.38083
2011-09-13	3.435
2011-09-14	3.8775
2011-09-15	2.6225
2011-09-16	0.64625
2011-09-17	4.37875
2011-09-18	2.4375
2011-09-19	6.24542
2011-09-20	4.86542
2011-09-21	5.13125
2011-09-22	6.32208
2011-09-23	5.5525
2011-09-24	4.55833
2011-09-25	3.19125
2011-09-26	5.04708
2011-09-27	3.6675
2011-09-28	3.47542
2011-09-29	2.35292
2011-09-30	4.19917
2011-10-01	3.50167
2011-10-02	1.585
2011-10-03	2.15917
2011-10-04	-0.15833
2011-10-05	-0.6875
2011-10-06	0.61583
2011-10-07	2.49875
2011-10-08	3.54333
2011-10-09	0.45833
2011-10-10	0.33625
2011-10-11	0.72917
2011-10-12	0.59333
2011-10-13	0.18167
2011-10-14	1.39917
2011-10-15	-0.03417
2011-10-16	-0.08125
2011-10-17	0.21375
2011-10-18	1.48917
2011-10-19	0.46417
2011-10-20	1.65417
2011-10-21	2.14792
2011-10-22	0.84125
2011-10-23	-0.04458
2011-10-24	-1.11458
2011-10-25	-0.56792
2011-10-26	-1.02417
2011-10-27	-0.30083
2011-10-28	0.43125
2011-10-29	-0.8575
2011-10-30	-2.99583
2011-10-31	-4.04292
2011-11-01	0.3125
2011-11-02	0.20833
2011-11-03	0
2011-11-04	0
2011-11-05	-0.13542
2011-11-06	0.05208
2011-11-07	0.04167
2011-11-08	0.01042
2011-11-09	-0.0625
2011-11-10	-0.27083
2011-11-11	-0.54167
2011-11-12	-0.4375
2011-11-13	-0.70833
2011-11-14	-0.45833
2011-11-15	-0.47917
2011-11-16	-0.55208
2011-11-17	-1.04167
2011-11-18	-0.89583
2011-11-19	-0.90625
2011-11-20	-0.94792
2011-11-21	-0.96875
2011-11-22	-0.89583
2011-11-23	-1.04167
2011-11-24	-1.15625
2011-11-25	0.7625
2011-11-26	0.225
2011-11-27	0.469
2011-11-28	0
2011-11-29	0
2011-11-30	0.1875
2011-12-01	0.024
2011-12-02	0.125
2011-12-03	0
2011-12-04	0
2011-12-05	0
2011-12-06	0.02083
2011-12-07	0.47917
2011-12-08	0.08333
2011-12-09	0.02083
2011-12-10	0
2011-12-11	0
2011-12-12	0
2011-12-13	0
2011-12-14	0
2011-12-15	0
2011-12-16	0
2011-12-17	-0.39583
2011-12-18	-0.5
2011-12-19	-0.5
2011-12-20	-0.6875
2011-12-21	-1.0625
2011-12-22	-1.22917
2011-12-23	-0.95833
2011-12-24	-1
2011-12-25	-1.35417
2011-12-26	-1.77083
2011-12-27	-1.64583
2011-12-28	-1.83333
2011-12-29	-2.39583
2011-12-30	-2.5625
2011-12-31	-2.10417
2012-01-01	-2.6875
2012-01-02	-3.02083
2012-01-03	-3
2012-01-04	-2.79167
2012-01-05	-2.10417
2012-01-06	-2.83333
2012-01-07	-3.27083
2012-01-08	-2.66667
2012-01-09	-3.39583
2012-01-10	-3.29167
2012-01-11	-2.91667
2012-01-12	-2.64583
2012-01-13	-3.1875
2012-01-14	-3.625
2012-01-15	-3.3125
2012-01-16	-4.66667
2012-01-17	-5.16667
2012-01-18	-5.89583
2012-01-19	-6.6875
2012-01-20	-5.3125
2012-01-21	-4.89583
2012-01-22	-5.16667
2012-01-23	-4.4375
2012-01-24	-4.33333
2012-01-25	-3.70833
2012-01-26	-3.8125
2012-01-27	-4.91667
2012-01-28	-5.41667
2012-01-29	-5.04167
2012-01-30	-4.89583
2012-01-31	-5.4375
2012-02-01	-5.10417
2012-02-02	-3.89583
2012-02-03	-4.3125
2012-02-04	-5.35417
2012-02-05	-5.1875
2012-02-06	-4
2012-02-07	-3.52083
2012-02-08	-3.22917
2012-02-09	-3.64583
2012-02-10	-3.72917
2012-02-11	-3.20833
2012-02-12	-3.41667
2012-02-13	-3.875
2012-02-14	-5.02083
2012-02-15	-4.83333
2012-02-16	-4.08333
2012-02-17	-4.70833
2012-02-18	-5.0625
2012-02-19	-4.9375
2012-02-20	-5.10417
2012-02-21	-5.28708
2012-02-22	-5.03708
2012-02-23	-4.6025
2012-02-24	-4.1475
2012-02-25	-3.17083
2012-02-26	-2.17542
2012-02-27	-2.18458
2012-02-28	-2.30542
2012-02-29	-1.29042
2012-03-01	-2.17875
2012-03-02	-2.32667
2012-03-03	-2.29667
2012-03-04	-2.37292
2012-03-05	-2.80542
2012-03-06	-3.18583
2012-03-07	-3.29417
2012-03-08	-3.18042
2012-03-09	-3.03917
2012-03-10	-2.94917
2012-03-11	-2.8675
2012-03-12	-2.73917
2012-03-13	-2.65667
2012-03-14	-2.52458
2012-03-15	-2.09417
2012-03-16	-1.46917
2012-03-17	-1.37458
2012-03-18	-1.66958
2012-03-19	-1.93333
2012-03-20	-1.92458
2012-03-21	-1.11208
2012-03-22	-0.49917
2012-03-23	-0.80583
2012-03-24	-1.53875
2012-03-25	-1.34875
2012-03-26	-0.74708
2012-03-27	-0.455
2012-03-28	-0.41417
2012-03-29	-0.41417
2012-03-30	-0.41417
2012-03-31	-0.41417
2012-04-01	-0.43625
2012-04-02	-0.78042
2012-04-03	-0.91792
2012-04-04	-0.72375
2012-04-05	-0.51667
2012-04-06	-0.48417
2012-04-07	-0.47833
2012-04-08	-0.46667
2012-04-09	-0.45208
2012-04-10	-0.43167
2012-04-11	0.20417
2012-04-12	-0.025
2012-04-13	1.09833
2012-04-14	1.13625
2012-04-15	-1.74667
2012-04-16	-0.53708
2012-04-17	-0.67
2012-04-18	-1.14792
2012-04-19	0.59125
2012-04-20	3.65083
2012-04-21	4.98042
2012-04-22	3.20667
2012-04-23	3.28125
2012-04-24	1.94667
2012-04-25	-0.30625
2012-04-26	0.95167
2012-04-27	2.38417
2012-04-28	1.57625
2012-04-29	1.94333
2012-04-30	0.59125
2012-05-01	-0.02833
2012-05-02	-0.97667
2012-05-03	0.15042
2012-05-04	0.22833
2012-05-05	0.20833
2012-05-06	0.57375
2012-05-07	1.37
2012-05-08	1.17833
2012-05-09	0.04208
2012-05-10	0.97917
2012-05-11	1.725
2012-05-12	3.29167
2012-05-13	3.45833
2012-05-14	2.15458
2012-05-15	1.6675
2012-05-16	1.33375
2012-05-17	0.66625
2012-05-18	1.45833
2012-05-19	3.10333
2012-05-20	4.02042
2012-05-21	3.91667
2012-05-22	4.125
2012-05-23	5.03333
2012-05-24	3.67083
2012-05-25	3.05083
2012-05-26	4.31
2012-05-27	4.05
2012-05-28	3.99708
2012-05-29	1.81875
2012-05-30	4.35792
2012-05-31	2.14458
2012-06-01	3.85454
2012-06-02	5.125
2012-06-03	5.58333
2012-06-04	7.625
2012-06-05	5.72792
2012-06-06	7.625
2012-06-07	7.45833
2012-06-08	5.54792
2012-06-09	3.4875
2012-06-10	2.975
2012-06-11	3.85667
2012-06-12	5.00542
2012-06-13	6.3175
2012-06-14	7.53292
2012-06-15	7.8625
2012-06-16	8.79542
2012-06-17	10.4971
2012-06-18	10.7092
2012-06-19	10.2542
2012-06-20	8.73042
2012-06-21	9.21125
2012-06-22	8.20583
2012-06-23	9.48875
2012-06-24	6.97958
2012-06-25	8.89208
2012-06-26	7.54542
2012-06-27	8.84542
2012-06-28	10.7804
2012-06-29	9.51208
2012-06-30	9.96458
2012-07-01	12.2279
2012-07-02	12.5325
2012-07-03	13.7954
2012-07-04	9.05958
2012-07-05	10.2621
2012-07-06	10.0192
2012-07-07	12.5633
2012-07-08	10.035
2012-07-09	9.92833
2012-07-10	9.81125
2012-07-11	11.0479
2012-07-12	11.2933
2012-07-13	10.7321
2012-07-14	12.2342
2012-07-15	9.54833
2012-07-16	9.76667
2012-07-17	6.9625
2012-07-18	8.85833
2012-07-19	7.785
2012-07-20	9.55792
2012-07-21	8.52333
2012-07-22	10.4392
2012-07-23	11.9829
2012-07-24	11.0325
2012-07-25	11.3271
2012-07-26	12.0842
2012-07-27	11.5275
2012-07-28	9.80292
2012-07-29	7.49542
2012-07-30	10.6058
2012-07-31	10.2788
2012-08-01	10.9571
2012-08-02	9.83792
2012-08-03	10.1738
2012-08-04	11.3667
2012-08-05	12.2208
2012-08-06	13.1738
2012-08-07	6.46
2012-08-08	8.44833
2012-08-09	11.5821
2012-08-10	12.2875
2012-08-11	8.19625
2012-08-12	10.3375
2012-08-13	11.4517
2012-08-14	13.2667
2012-08-15	12.41
2012-08-16	11.6608
2012-08-17	11.3475
2012-08-18	11.7558
2012-08-19	11.8133
2012-08-20	10.9792
2012-08-21	10.8854
2012-08-22	10.9946
2012-08-23	11.16
2012-08-24	11.4467
2012-08-25	11.2304
2012-08-26	11.9646
2012-08-27	11.6871
2012-08-28	11.8436
2012-08-29	11.6769
2012-08-30	10.8436
2012-08-31	12.0519
2012-09-01	11.5102
2012-09-02	10.6352
2012-09-03	9.42692
2012-09-04	7.96858
2012-09-05	7.82525
2012-09-06	7.75625
2012-09-07	7.75625
2012-09-08	7.94375
2012-09-09	9.04875
2012-09-10	7.20875
2012-09-11	8.29042
2012-09-12	8.55958
2012-09-13	8.4925
2012-09-14	9.97083
2012-09-15	10.7117
2012-09-16	11.3712
2012-09-17	13.0096
2012-09-18	12.1508
2012-09-19	10.0467
2012-09-20	10.2404
2012-09-21	13.0363
2012-09-22	11.6733
2012-09-23	9.54792
2012-09-24	8.88042
2012-09-25	4.77208
2012-09-26	6.71708
2012-09-27	7.65
2012-09-28	5.29417
2012-09-29	6.89417
2012-09-30	3.725
2012-10-01	6.20917
2012-10-02	5.36042
2012-10-03	3.88
2012-10-04	7.08958
2012-10-05	6.17458
2012-10-06	5.57375
2012-10-07	4.76625
2012-10-08	4.76917
2012-10-09	5.44542
2012-10-10	7.68208
2012-10-11	8.19875
2012-10-12	8.88292
2012-10-13	9.47375
2012-10-14	5.82458
2012-10-15	3.7225
2012-10-16	0.00667
2012-10-17	1.94208
2012-10-18	0.58
2012-10-19	0.25
2012-10-20	-0.2675
2012-10-21	-0.32167
2012-10-22	-0.225
2012-10-23	-0.51917
2012-10-24	-0.77875
2012-10-25	0.59125
2012-10-26	0.35
2012-10-27	0.65
2012-10-28	-1.56
2012-10-29	-0.34
2012-10-30	0.48
2012-10-31	-0.85
2012-11-01	0.5
2012-11-02	0.41667
2012-11-03	0
2012-11-04	0
2012-11-05	-0.29167
2012-11-06	-0.375
2012-11-07	0
2012-11-08	0
2012-11-09	-0.125
2012-11-10	-0.54167
2012-11-11	-1.08333
2012-11-12	-0.875
2012-11-13	-1.41667
2012-11-14	-0.91667
2012-11-15	-0.95833
2012-11-16	-0.70833
2012-11-17	-1.58333
2012-11-18	-1.29167
2012-11-19	-1.125
2012-11-20	-0.83333
2012-11-21	-0.70833
2012-11-22	-0.83333
2012-11-23	-1.08333
2012-11-24	-0.95833
2012-11-25	-0.5
2012-11-26	-0.5
2012-11-27	-0.95833
2012-11-28	-0.875
2012-11-29	-1.16667
2012-11-30	-1.33333
2012-12-01	-1.16667
2012-12-02	-1.79167
2012-12-03	-2.875
2012-12-04	-3.33333
2012-12-05	-4.08333
2012-12-06	-3.875
2012-12-07	-4.375
2012-12-08	-4.375
2012-12-09	-3.45833
2012-12-10	-2.45833
2012-12-11	-2.58333
2012-12-12	-2.95833
2012-12-13	-2.70833
2012-12-14	-4.16667
2012-12-15	-4.25
2012-12-16	-3.58333
2012-12-17	-2.875
2012-12-18	-3.54167
2012-12-19	-3.41667
2012-12-20	-3
2012-12-21	-2.95833
2012-12-22	-3.41667
2012-12-23	-5.54167
2012-12-24	-4.20833
2012-12-25	-4.25
2012-12-26	-4
2012-12-27	-4.91667
2012-12-28	-4
2012-12-29	-4.29167
2012-12-30	-5.83333
2012-12-31	-6.375
2013-01-01	-6.29167
2013-01-02	-4.83333
2013-01-03	-4.33333
2013-01-04	-4.16667
2013-01-05	-3.91667
2013-01-06	-3.45833
2013-01-07	-3.25
2013-01-08	-3.29167
2013-01-09	-3.95833
2013-01-10	-4.75
2013-01-11	-5.375
2013-01-12	-5.5
2013-01-13	-5.66667
2013-01-14	-5.29167
2013-01-15	-5.08333
2013-01-16	-5
2013-01-17	-5.125
2013-01-18	-4.66667
2013-01-19	-3.33333
2013-01-20	-3.45833
2013-01-21	-3.375
2013-01-22	-4.83333
2013-01-23	-6.875
2013-01-24	-6.16667
2013-01-25	-5.45833
2013-01-26	-6.33333
2013-01-27	-6.20833
2013-01-28	-5.75
2013-01-29	-5.79167
2013-01-30	-4.41667
2013-01-31	-4.75
2013-02-01	-4.66667
2013-02-02	-3.83333
2013-02-03	-2.83333
2013-02-04	-3.5
2013-02-05	-3.75
2013-02-06	-2.91667
2013-02-07	-2.16667
2013-02-08	-1.95833
2013-02-09	-2.79167
2013-02-10	-4.20833
2013-02-11	-3.79167
2013-02-12	-3.54167
2013-02-13	-3.58333
2013-02-14	-2.95833
2013-02-15	-3.375
2013-02-16	-3.25
2013-02-17	-1.875
2013-02-18	-1.83333
2013-02-19	-2.625
2013-02-20	-3.125
2013-02-21	-2.79167
2013-02-22	-2.875
2013-02-23	-2.79167
2013-02-24	-2.04167
2013-02-25	-1.33333
2013-02-26	-0.66667
2013-02-27	-0.875
2013-02-28	-0.759
2013-03-01	-0.573
2013-03-02	-0.91667
2013-03-03	-1.25
2013-03-04	-2
2013-03-05	-2.58333
2013-03-06	-1.45833
2013-03-07	-2.20833
2013-03-08	-2.25
2013-03-09	-1.54167
2013-03-10	-0.83333
2013-03-11	-0.83333
2013-03-12	-0.91667
2013-03-13	-0.91667
2013-03-14	-0.58333
2013-03-15	-0.54167
2013-03-16	-0.33333
2013-03-17	-0.20833
2013-03-18	-0.79167
2013-03-19	-0.70833
2013-03-20	-0.95833
2013-03-21	-0.95833
2013-03-22	-1
2013-03-23	-1
2013-03-24	-0.70833
2013-03-25	-0.41667
2013-03-26	-0.54167
2013-03-27	-0.29167
2013-03-28	-0.66667
2013-03-29	-0.70833
2013-03-30	-0.08333
2013-03-31	-0.41667
2013-04-01	-0.33333
2013-04-02	-0.5
2013-04-03	-0.54167
2013-04-04	0.58333
2013-04-05	-0.5
2013-04-06	-0.5
2013-04-07	-0.5
2013-04-08	-0.5
2013-04-09	-0.5
2013-04-10	-0.875
2013-04-11	-1
2013-04-12	-1
2013-04-13	-1
2013-04-14	-1
2013-04-15	-1
2013-04-16	-0.91667
2013-04-17	-0.91667
2013-04-18	-0.08333
2013-04-19	0.45833
2013-04-20	1.125
2013-04-21	2
2013-04-22	1.70833
2013-04-23	-0.5
2013-04-24	-0.5
2013-04-25	-0.5
2013-04-26	-0.33333
2013-04-27	2.33333
2013-04-28	1.41667
2013-04-29	0.29167
2013-04-30	2.41667
2013-05-01	-0.47917
2013-05-02	-0.39583
2013-05-03	-0.3125
2013-05-04	-0.25
2013-05-05	0.08333
2013-05-06	1.02083
2013-05-07	1.39583
2013-05-08	1.39583
2013-05-09	1.04167
2013-05-10	1.5625
2013-05-11	1.8125
2013-05-12	1.0625
2013-05-13	0.8125
2013-05-14	-0.25
2013-05-15	0.375
2013-05-16	0.77083
2013-05-17	0.64583
2013-05-18	1.6875
2013-05-19	2.0625
2013-05-20	2.89583
2013-05-21	2.77083
2013-05-22	2.3
2013-05-23	0.64583
2013-05-24	0.45833
2013-05-25	1.75
2013-05-26	2.60417
2013-05-27	3.33333
2013-05-28	3.5
2013-05-29	3.29167
2013-05-30	1.35417
2013-05-31	0.1875
2013-06-01	-0.22917
2013-06-02	0.375
2013-06-03	3.08333
2013-06-04	4.75
2013-06-05	4.29167
2013-06-06	4.625
2013-06-07	5.375
2013-06-08	5.64583
2013-06-09	5.625
2013-06-10	5.97917
2013-06-11	5.6875
2013-06-12	6.25
2013-06-13	5.83333
2013-06-14	5.91667
2013-06-15	7.02083
2013-06-16	7.10417
2013-06-17	7.39583
2013-06-18	7.97917
2013-06-19	8.1875
2013-06-20	8.6875
2013-06-21	9.29167
2013-06-22	8.47917
2013-06-23	7.52083
2013-06-24	6.20833
2013-06-25	8.51688
2013-06-26	7.17021
2013-06-27	8.47021
2013-06-28	10.4052
2013-06-29	9.13687
2013-06-30	8.81979
2013-07-01	10.9675
2013-07-02	10.8804
2013-07-03	11.4017
2013-07-04	7.75396
2013-07-05	10.2142
2013-07-06	9.68979
2013-07-07	11.0754
2013-07-08	9.95688
2013-07-09	10.0967
2013-07-10	10.4202
2013-07-11	8.92792
2013-07-12	8.58563
2013-07-13	10.6006
2013-07-14	10.0369
2013-07-15	9.20917
2013-07-16	9.81
2013-07-17	7.40375
2013-07-18	8.75792
2013-07-19	8.35521
2013-07-20	9.73521
2013-07-21	8.81438
2013-07-22	9.34396
2013-07-23	9.37854
2013-07-24	9.50125
2013-07-25	10.9925
2013-07-26	11.6115
2013-07-27	10.569
2013-07-28	10.7312
2013-07-29	9.80021
2013-07-30	10.6708
2013-07-31	8.42521
2013-08-01	8.51604
2013-08-02	9.94688
2013-08-03	10.2935
2013-08-04	10.5796
2013-08-05	10.8594
2013-08-06	11.7506
2013-08-07	8.94833
2013-08-08	9.68812
2013-08-09	11.474
2013-08-10	10.8597
2013-08-11	11.61
2013-08-12	11.3079
2013-08-13	13.8906
2013-08-14	14.1967
2013-08-15	13.425
2013-08-16	13.019
2013-08-17	13.9389
2013-08-18	13.2466
2013-08-19	13.2258
2013-08-20	12.7446
2013-08-21	11.4596
2013-08-22	7.73991
2013-08-23	7.55507
2013-08-24	7.38758
2013-08-25	6.77587
2013-08-26	7.69644
2013-08-27	8.35656
2013-08-28	10.3318
2013-08-29	10.9262
2013-08-30	11.6497
2013-08-31	12.5086
2013-09-01	12.6336
2013-09-02	11.6724
2013-09-03	13.1045
2013-09-04	12.788
2013-09-05	10.3492
2013-09-06	8.07351
2013-09-07	6.77474
2013-09-08	9.19269
2013-09-09	9.15961
2013-09-10	7.41865
2013-09-11	7.99078
2013-09-12	5.97267
2013-09-13	7.98314
2013-09-14	9.18638
2013-09-15	10.5309
2013-09-16	7.16745
2013-09-17	4.91403
2013-09-18	5.17286
2013-09-19	6.23749
2013-09-20	6.20783
2013-09-21	5.4463
2013-09-22	7.21333
2013-09-23	5.76209
2013-09-24	5.23218
2013-09-25	7.39443
2013-09-26	6.56211
2013-09-27	3.79145
2013-09-28	4.39465
2013-09-29	4.37369
2013-09-30	3.35696
2013-10-01	1.67174
2013-10-02	1.4507
2013-10-03	2.55929
2013-10-04	2.71008
2013-10-05	3.61452
2013-10-06	4.76708
2013-10-07	6.52431
2013-10-08	7.69024
2013-10-09	7.13143
2013-10-10	6.63584
2013-10-11	2.90716
2013-10-12	1.56181
2013-10-13	1.03636
2013-10-14	-0.72172
2013-10-15	0.77933
2013-10-16	1.95086
2013-10-17	3.45914
2013-10-18	1.39417
2013-10-19	3.76026
2013-10-20	3.25601
2013-10-21	3.46337
2013-10-22	1.88105
2013-10-23	2.78091
2013-10-24	2.70165
2013-10-25	0.98061
2013-10-26	-2.47013
2013-10-27	-2.1306
2013-10-28	-1.86691
2013-10-29	-0.14468
2013-10-30	1.40264
2013-10-31	-0.61046
