# Supplementary material for: Seasonal and interannual dynamics of soil microbial biomass and available nitrogen in an alpine meadow in the eastern part of Qinghai–Tibet Plateau, China
Source: Copernicus journal article supplement (doi:10.5194/bg-15-567-2018), 2018-01-29
Supplement: Supplementary file 1 [file bg-15-567-2018-supplement.zip]

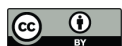

## *Supplement of*

# **Seasonal and interannual dynamics of soil microbial biomass and available nitrogen in an alpine meadow in the eastern part of Qinghai–Tibet Plateau, China**

**Bo Xu et al.**

*Correspondence to:* Fusun Shi (shifs@cib.ac.cn)

- bg-15-567-2018-supplement-title-page.pdf
- Data
  - Figure 2.xlsx
  - Figure 3.xlsx
  - Figure 4.xlsx
  - Figure 5.xlsx
  - Figure 6.xlsx
  - Figure 7.xlsx
  - Figure 8.xlsx

The copyright of individual parts of the supplement might differ from the CC BY 3.0 License.
