# Supplementary material for: Seasonal and interannual dynamics of soil microbial biomass and available nitrogen in an alpine meadow in the eastern part of Qinghai–Tibet Plateau, China
Source: Copernicus journal article supplement (doi:10.5194/bg-15-567-2018), 2018-01-29
Supplement: Supplementary file 3 [file Figure 3.xlsx]

## Sheet: 2A
Year	Date	Soil water content(SWC,%)	SE
2011	Apr	66.9717	5.19789
2011	May	62.01	4.82393
2011	Jun	52.2483	3.34724
2011	Jul	55.1467	2.11263
2011	Aug	50.23	2.255
2011	Sep	52.835	3.71905
2011	Oct	56.155	1.995
2011	Nov	60.7583	3.03232
2011	Dec	59.1167	1.75973
2012	Jan	64.5433	3.07633
2012	Feb	70.3167	4.66834
2012	Mar	65.1817	4.75844
2012	Apr	68.46	5.85
2012	May	48.9901	2.97155
2012	Jun	44.568	2.125
2012	Jul	40.1589	1.14322
2012	Aug	41.8308	1.46814
2012	Sep	49.1159	2.72265
2012	Oct	53.915	2.96
2012	Nov	61.315	3.75
2012	Dec	77.1033	2.96586
2013	Jan	71.41	2.53465
2013	Feb	71.4817	4.19441
2013	Mar	60.6667	4.20692
2013	Apr	52.1273	5.39859
2013	May	47.2282	3.1017
2013	Jun	48.9292	5.28665
2013	Jul	53.955	4.79982
2013	Aug	50.438	4.18337
2013	Sep	56.1299	3.92622
2013	Oct	58.2876	3.56891

## Sheet: 2B
Code	SWC(%)	SE
2011-2012 growing season	54.7708	4.47424
2011-2012 non-growing season	64.7294	4.96285
2012-2013 growing season	46.4298	5.08938
2012-2013 non-growing season	65.684	9.01823
2013 growing season	52.4947	5.02948
