# Supplementary material for: Seasonal and interannual dynamics of soil microbial biomass and available nitrogen in an alpine meadow in the eastern part of Qinghai–Tibet Plateau, China
Source: Copernicus journal article supplement (doi:10.5194/bg-15-567-2018), 2018-01-29
Supplement: Supplementary file 4 [file Figure 4.xlsx]

## Sheet: 3A
Year	Date	MBC	SE
2011	Apr	849.495	83.16
2011	May	418.064	40.9062
2011	Jun	334.683	45.6925
2011	Jul	286.036	27.0169
2011	Aug	216.645	26.8709
2011	Sep	159.81	9.725
2011	Oct	415.793	36.739
2011	Nov	754.331	69.7979
2011	Dec	768.225	75.1812
2012	Jan	838.072	57.9773
2012	Feb	749.344	47.8536
2012	Mar	970.066	93.9026
2012	Apr	524.835	35.78
2012	May	173.016	18.9455
2012	Jun	127.513	12.2247
2012	Jul	117.233	12.428
2012	Aug	110.616	7.04409
2012	Sep	102.654	11.929
2012	Oct	230.167	23.4779
2012	Nov	701.7	77.5763
2012	Dec	1078.14	83.355
2013	Jan	1002.7	73.155
2013	Feb	942.935	88.275
2013	Mar	1173.49	99.515
2013	Apr	764.578	72.3473
2013	May	399.973	35.6123
2013	Jun	351.409	34.9132
2013	Jul	305.162	32.9759
2013	Aug	240.524	21.7159
2013	Sep	207.281	18.9838
2013	Oct	311.029	33.2533

## Sheet: 3B
Year	Date	MBN	SE
2011	Apr	98.46	7.585
2011	May	129.644	8.15761
2011	Jun	122.216	9.46904
2011	Jul	95.7916	5.23116
2011	Aug	83.5325	4.78125
2011	Sep	58.8	2.6625
2011	Oct	71.775	3.65625
2011	Nov	84.75	3.65
2011	Dec	66.9211	4.57478
2012	Jan	73.2447	4.23674
2012	Feb	65.6336	6.51882
2012	Mar	79.0977	4.45567
2012	Apr	106.974	4.97574
2012	May	87.6922	5.20125
2012	Jun	88.168	4.536
2012	Jul	76.5605	3.68916
2012	Aug	59.0143	3.48028
2012	Sep	60.9507	5.0209
2012	Oct	59.9825	3.25059
2012	Nov	80.578	5.15594
2012	Dec	83.9466	6.74492
2013	Jan	77.2095	3.56695
2013	Feb	80.7142	3.16531
2013	Mar	88.9902	4.4999
2013	Apr	116.148	4.86182
2013	May	128.809	10.1928
2013	Jun	112.28	6.79382
2013	Jul	106.588	5.7554
2013	Aug	91.3186	8.50161
2013	Sep	75.5933	3.0221
2013	Oct	85.7625	8.2018

## Sheet: 3C
Code	MBC	SE1	MBN	SE2
2011-2012 growing season	305.172	44.9186	93.6265	11.7809
2011-2012 non-growing season	767.479	63.9332	79.4368	6.54363
2012-2013 growing season	143.533	20.9929	72.0614	5.9251
2012-2013 non-growing season	943.925	80.0059	87.9311	6.16898
2013 growing season	302.563	30.8702	100.058	8.43584
