# Supplementary material for: Seasonal and interannual dynamics of soil microbial biomass and available nitrogen in an alpine meadow in the eastern part of Qinghai–Tibet Plateau, China
Source: Copernicus journal article supplement (doi:10.5194/bg-15-567-2018), 2018-01-29
Supplement: Supplementary file 5 [file Figure 5.xlsx]

## Sheet: Sheet1
Date	Bacteria (A)	SE(A)	Fungi (B)	SE(B)	Actinomycetes (C)	SE (C)
2012-03-15	1.7	0.07701	2.86	0.10715	8.5	1.75945
2012-05-15	7.22	0.25113	1.21	0.05023	2.18	0.10715
2012-03-15	1.51	0.07367	4.33	0.16073	9.812	2.0555
2013-05-15	8.25	0.30136	1.34	0.06362	2.556	0.11914
