# Supplementary material for: Seasonal and interannual dynamics of soil microbial biomass and available nitrogen in an alpine meadow in the eastern part of Qinghai–Tibet Plateau, China
Source: Copernicus journal article supplement (doi:10.5194/bg-15-567-2018), 2018-01-29
Supplement: Supplementary file 6 [file Figure 6.xlsx]

## Sheet: 6A
Year	Date	DOC	SE
2011	Apr	477.15	46.2722
2011	May	608.956	61.2222
2011	Jun	514.367	47.01
2011	Jul	219.7	11.15
2011	Aug	172.172	21.2278
2011	Sep	105.133	12.0204
2011	Oct	107.79	13.79
2011	Nov	110.45	10.56
2011	Dec	115.76	14.1
2012	Jan	130.42	14.07
2012	Feb	169.07	17.64
2012	Mar	206.383	21.1706
2012	Apr	313.53	24.05
2012	May	331.8	35.07
2012	Jun	250.94	15.98
2012	Jul	138.27	14.09
2012	Aug	114.27	10.94
2012	Sep	88.04	7.63
2012	Oct	101.8	10.97
2012	Nov	169.56	14.3
2012	Dec	215.08	18.96
2013	Jan	230.84	20.3
2013	Feb	294.6	23.63
2013	Mar	342.12	28.29
2013	Apr	527.07	45.22
2013	May	782.59	54.15
2013	Jun	674.92	44.62
2013	Jul	257.19	19.98
2013	Aug	195.64	21.27
2013	Sep	101.2	17.4068
2013	Oct	311.029	33.2533

## Sheet: 6B
Code	DOC	SE
2011-2012 growing season	288.02	91.2892
2011-2012 non-growing season	174.269	32.5857
2012-2013 growing season	170.853	41.188
2012-2013 non-growing season	296.545	53.976
2013 growing season	356.14	123.234
