# Supplementary material for: Seasonal and interannual dynamics of soil microbial biomass and available nitrogen in an alpine meadow in the eastern part of Qinghai–Tibet Plateau, China
Source: Copernicus journal article supplement (doi:10.5194/bg-15-567-2018), 2018-01-29
Supplement: Supplementary file 7 [file Figure 7.xlsx]

## Sheet: 7A
Year	Date	Ammonium N	SE
2011	Apr	32.13	1.92
2011	May	23.41	1.63
2011	Jun	19.26	1.07
2011	Jul	8.44	0.88
2011	Aug	7.44	0.45
2011	Sep	6.17	0.69
2011	Oct	2.17	0.19
2011	Nov	4.42471	0.39
2011	Dec	13.3175	1.21869
2012	Jan	13.1468	0.86
2012	Feb	18.132	0.47175
2012	Mar	23.451	1.21
2012	Apr	30.934	3.18399
2012	May	22.3631	2.02
2012	Jun	16.7399	1.77119
2012	Jul	6.75467	0.71
2012	Aug	5.75107	0.59
2012	Sep	4.70794	0.52603
2012	Oct	3.01356	0.19755
2012	Nov	14.66	1.39
2012	Dec	17.06	1.7
2013	Jan	15.5	0.98
2013	Feb	24.37	2.75
2013	Mar	22.61	1.92
2013	Apr	39.0887	3.87
2013	May	25.5	2.25
2013	Jun	17.1585	1.00932
2013	Jul	8.42471	0.934
2013	Aug	3.06347	0.19807
2013	Sep	1.27182	0.15
2013	Oct	2.49	0.18724

## Sheet: 7B
Year	Date	Nitrate N	SE
2011	Apr	8.04298	1.5626
2011	May	4.17784	0.84844
2011	Jun	21.9056	2.50046
2011	Jul	14.3231	3.65287
2011	Aug	10.5249	2.34115
2011	Sep	7.59998	0.69612
2011	Oct	5.43	0.65
2011	Nov	5.43087	0.56721
2011	Dec	5.49893	0.65
2012	Jan	7.24007	1.03194
2012	Feb	6.93	0.38666
2012	Mar	8.17	0.89
2012	Apr	12.5587	1.19103
2012	May	6.89123	0.58666
2012	Jun	19.6813	1.31102
2012	Jul	15.1983	2.01632
2012	Aug	12.467	1.29489
2012	Sep	9.66896	1.02413
2012	Oct	9.70104	0.64153
2012	Nov	7.59998	0.69612
2012	Dec	7.1661	0.54
2013	Jan	9.03247	0.3
2013	Feb	9.77573	1.28
2013	Mar	11.3061	1.42
2013	Apr	13.0931	1.63
2013	May	5.93834	0.68648
2013	Jun	20.1837	1.55885
2013	Jul	12.9816	1.16069
2013	Aug	9.47	0.75541
2013	Sep	7.00462	1.07
2013	Oct	4.33903	0.40545

## Sheet: 7C
Year	Date	DOC	SE
2011	Apr	10.41	0.94
2011	May	15.03	1.55
2011	Jun	14.4734	1.12
2011	Jul	13.17	0.74
2011	Aug	9.64	0.79
2011	Sep	7.19275	0.52282
2011	Oct	4.74549	0.25563
2011	Nov	5.64	0.58
2011	Dec	5.08063	0.43832
2012	Jan	8.55354	0.9
2012	Feb	7.17	0.74
2012	Mar	10.9578	0.52803
2012	Apr	13.171	1.27002
2012	May	10.1335	0.99
2012	Jun	9.3563	0.86
2012	Jul	6.313	0.35798
2012	Aug	4.19	0.33
2012	Sep	4.50562	0.52
2012	Oct	3.57	0.25
2012	Nov	4.42	0.36
2012	Dec	4.53477	0.38
2013	Jan	6.95303	0.72
2013	Feb	7.39613	0.69
2013	Mar	6.28531	0.44838
2013	Apr	15.6372	0.98
2013	May	16.2546	1.21
2013	Jun	15.4358	1.40181
2013	Jul	13.9664	1.36
2013	Aug	7.01233	0.67
2013	Sep	5.30358	0.43
2013	Oct	5.14632	0.57
