# Supplementary material for: Seasonal and interannual dynamics of soil microbial biomass and available nitrogen in an alpine meadow in the eastern part of Qinghai–Tibet Plateau, China
Source: Copernicus journal article supplement (doi:10.5194/bg-15-567-2018), 2018-01-29
Supplement: Supplementary file 8 [file Figure 8.xlsx]

## Sheet: Sheet1
Code	Ammonium N	SE	Nitrate N	SE	DOC	SE
2011-2012 growing season	12.6017	4.63487	11.1602	3.25339	10.7086	1.76703
2011-2012 non-growing season	17.2343	3.85226	7.63809	1.12474	8.42883	1.3308
2012-2013 growing season	9.88837	3.25779	11.6768	2.45074	6.34474	1.17874
2012-2013 non-growing season	22.2148	3.86967	9.66225	0.99921	7.53773	1.73684
2013 growing season	9.65141	4.05758	9.90287	2.37416	10.5198	2.20058
